# Supplementary material for: Health and Environmental Co-Benefits of City Urban Form in Latin America: An Ecological Study
Source: MDPI journal article supplement (doi:10.3390/su142214715), 2022-11-08
Supplement: s1 [file s1]

**Table S1.** Urban landscape subdomains and metrics used to create urban landscape profiles.

| Subdomains    | Metric                                                | Abbreviation | Formula                                                                  | Description                                                                                                                                                                                                                                                                                                            | Icon                                                                                  |
|---------------|-------------------------------------------------------|--------------|--------------------------------------------------------------------------|------------------------------------------------------------------------------------------------------------------------------------------------------------------------------------------------------------------------------------------------------------------------------------------------------------------------|---------------------------------------------------------------------------------------|
| Area          | Total urban area                                      | TUA          | $TUA_i = \sum_{j \in i, j \in \text{urban}} A_j$                         | $A_j$ refers to the area of 30m × 30m gridcell $j$ within the geographic unit $i$ and categorized as urban.                                                                                                                                                                                                            | NA                                                                                    |
| Fragmentation | Number of Urban Patches (N)                           | NUP          | NA                                                                       | NA                                                                                                                                                                                                                                                                                                                     | 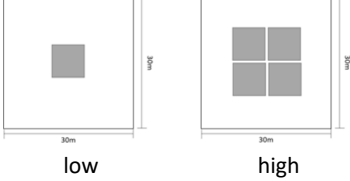   |
|               | Patch Density (N/km <sup>2</sup> )                    | PD           | $PD_i = \frac{NUP_i}{TUA_i}$                                             | NA                                                                                                                                                                                                                                                                                                                     |    |
|               | Area-weighted Mean Patch Size (km <sup>2</sup> /N)    | AWMPS        | $AWMPS_i = \frac{\sum_{j \in i} UA_j^2}{NUP_i}$                          | Where $UA_j$ refers to the area of urban patch $j$ located in the city $i$ .                                                                                                                                                                                                                                           |   |
|               | Effective Mesh Size (km <sup>2</sup> )                | EMS          | $EMS_i = \frac{\sum_{k \in i} UA_k^2}{TUA_i}$                            | Where $UA_j$ refers to the area of urban patch $j$ located in the city $i$ .                                                                                                                                                                                                                                           |  |
| Isolation     | Area-weighted Mean Nearest Neighbor Distance (meters) | AWMNND       | $AWMNND_i = \frac{\sum_{k \in i} \frac{NNGH_k * UA_k}{TUA_i}}{NUP_i}$    | Where $NNGH_k$ is the nearest neighbor distance of urban patch $k$ in city $i$ , $UA_k$ refers to the area of urban patch $k$ located in the city $i$                                                                                                                                                                  |  |
| Shape         | Area-weighted Mean Shape Index                        | AWMSI        | $AWMSI_i = \frac{\sum_{k \in i} \frac{SHPINDEX_k * UA_k}{TUA_i}}{NUP_i}$ | Where $SHPINDEX_k$ refers to the shape index of urban patch $k$ inside city $i$ , specifically, shape index is the ratio of the actual perimeter of a patch to the minimum perimeter possible for a maximally compact patch with the same size. $UA_k$ refers to the area of urban patch $k$ located in the city $i$ . |  |

Table S2. Urban Landscape profiles.

| Label                     | Description                                                                                                                          | Caption                                                                             | City example                                                                                                             |
|---------------------------|--------------------------------------------------------------------------------------------------------------------------------------|-------------------------------------------------------------------------------------|--------------------------------------------------------------------------------------------------------------------------|
| Scattered pixels          | Cities with low patch density and low area weighted mean patch size, high isolation, and patches with compact shape.                 | 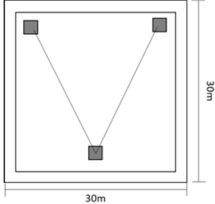   | <br>Fresnillo, Mexico (204192)        |
| Proximate stones          | Cities with moderate patch density and moderate area weighted mean patch size, moderate isolation, and patches with irregular shape. |    | <br>Pocos de Caldas, Brazil (102146)  |
| Proximate inkblots        | Cities with moderate patch density and high area weighted mean patch size, moderate isolation, and patches with complex shape.       |  | <br>Cartagena, Colombia (104104)     |
| Contiguous large inkblots | Cities with high patch density and high area weighted mean patch size, low isolation, and patches with complex shape.                |  | <br>Buenos Aires, Argentina (101101) |

**Table S3.** Correlations between outcomes (Spearman).

|                                                  | Lack of greenness | PM <sub>2.5</sub> | NO <sub>2</sub> | Carbon footprint | NCDs mortality | Non-intentional injuries mortality | Hypertension | Diabetes | Obesity | Total population | Social Environment Index |
|--------------------------------------------------|-------------------|-------------------|-----------------|------------------|----------------|------------------------------------|--------------|----------|---------|------------------|--------------------------|
| Environmental outcomes                           |                   |                   |                 |                  |                |                                    |              |          |         |                  |                          |
| Lack of greenness (1-NDVI)                       | 1                 |                   |                 |                  |                |                                    |              |          |         |                  |                          |
| PM <sub>2.5</sub> (µg/m <sup>3</sup> )           | -0.1334           | 1                 |                 |                  |                |                                    |              |          |         |                  |                          |
| NO <sub>2</sub> (ppb)                            | 0.2702            | 0.0031            | 1               |                  |                |                                    |              |          |         |                  |                          |
| Carbon footprint (CO <sub>2</sub> emissions/hab) | 0.2671            | -0.3366           | 0.4877          | 1                |                |                                    |              |          |         |                  |                          |
| Health outcomes                                  |                   |                   |                 |                  |                |                                    |              |          |         |                  |                          |
| NCDs mortality*                                  | 0.0293            | -0.1988           | 0.2484          | 0.3696           | 1              |                                    |              |          |         |                  |                          |
| Non-intentional injuries mortality*              | 0.1619            | -0.248            | -0.0889         | -0.0093          | 0.3336         | 1                                  |              |          |         |                  |                          |
| Hypertension**                                   | 0.0898            | -0.343            | 0.2961          | 0.4689           | 0.2081         | 0.0679                             | 1            |          |         |                  |                          |
| Diabetes**                                       | 0.1001            | -0.1761           | 0.3827          | 0.6065           | 0.6665         | 0.1074                             | 0.387        | 1        |         |                  |                          |
| Obesity**                                        | 0.2171            | -0.1622           | 0.2158          | 0.3496           | 0.6717         | 0.3063                             | 0.0942       | 0.6818   | 1       |                  |                          |
| Total population                                 | -0.0533           | -0.0449           | 0.2012          | -0.0424          | -0.0127        | -0.1445                            | 0.2494       | -0.0064  | -0.0726 | 1                |                          |
| Social Environment Index                         | 0.3968            | -0.2365           | 0.3542          | 0.3221           | -0.2492        | -0.1217                            | 0.0691       | -0.1026  | -0.1389 | 0.181            | 1                        |

\*Mortality rates per 100,000 hab adjusted by age.

\*\*Prevalences, median

**Table S4.** Associations of environmental and health outcomes with urban landscape profiles adjusted for social environment, country and total population.

| Urban landscape profiles                            | Scattered pixels | Proximate stones        | Proximate inkblots     | Contiguous large inkblots |
|-----------------------------------------------------|------------------|-------------------------|------------------------|---------------------------|
| Environmental outcomes                              |                  | Coef (95% CI)           | Coef (95% CI)          | Coef (95% CI)             |
| Lack of greenness (1-NDVI) <sup>a</sup>             | 0 (Ref.)         | -22.68 (-49.81, -0.46)* | -10.43 (-47.88, 21.27) | -15.34 (-81.82, 36.68)    |
| PM <sub>2.5</sub> (µg/m <sup>3</sup> ) <sup>a</sup> | 0 (Ref.)         | 16.71 (4.08, 30.87)*    | 18.74 (-2.82, 44.98)   | 34.07 (-3.20, 85.50)      |
| NO <sub>2</sub> (ppb) <sup>a</sup>                  | 0 (Ref.)         | 15.69 (-13.49, 51.89)   | 5.67 (-45.03, 61.94)   | 178.76 (29.23, 501.32)*   |
| Carbon footprint (CO <sub>2</sub> emissions/hab)    | 0 (Ref.)         | -0.07 (-0.18, 0.04)     | -0.12 (-0.29, 0.06)    | 0.15 (-0.22, 0.51)        |
| Health outcomes                                     |                  |                         |                        |                           |
| NCDs mortality                                      | 0 (Ref.)         | 14.68 (-11.99, 41.35)   | 24.1 (-8.57, 56.77)    | 39.1 (-20.23, 98.43)      |
| Non-intentional injuries mortality                  | 0 (Ref.)         | -0.89 (-6.14, 4.36)     | 6.83 (-0.4, 14.05)     | 11.59 (0.27, 22.91)*      |
| Hypertension                                        | 0 (Ref.)         | 0.01 (-0.49, 0.51)      | 0.43 (-0.43, 1.29)     | 0.56 (-1.13, 2.25)        |
| Diabetes                                            | 0 (Ref.)         | 0.2 (-0.14, 0.54)       | 0.23 (-0.29, 0.74)     | 0.6 (-0.23, 1.42)         |
| Obesity                                             | 0 (Ref.)         | -1 (-2.68, 0.68)        | -1.42 (-3.78, 0.93)    | -2.12 (-5.75, 1.51)       |

\*p<0.05; <sup>a</sup> Log-transformed variables. The results are reported as % of increase of the outcomes for every one-unit increase in the exposure. To do that, we applied the following formula:  $(\exp(\text{coef}) - 1) \times 100$ ; PM<sub>2.5</sub>, Particulate Matter that have a diameter of less than 2.5 micrometers. NO<sub>2</sub>, Nitrogen dioxide. CO<sub>2</sub>, Carbon dioxide; Linear regression models adjusted by climate zones, social environment index, country.

**Table S5.** Description of the latent class analysis for 2 classes.

|                                    | Class 1 | Class 2 |
|------------------------------------|---------|---------|
| Probability of Class               | 0.36    | 0.64    |
| Environmental outcomes             |         |         |
| Lack of green space                | -0.17   | 0.09    |
| PM <sub>2.5</sub>                  | 0.39    | -0.22   |
| NO <sub>2</sub>                    | -0.57   | 0.31    |
| Carbon footprint per capita        | -1.08   | 0.60    |
| Health outcomes                    |         |         |
| NCDs mortality                     | -0.82   | 0.45    |
| Non-intentional injuries mortality | -0.04   | 0.02    |
| Hypertension                       | -0.63   | 0.35    |
| Diabetes                           | -1.16   | 0.64    |
| Obesity                            | -0.77   | 0.43    |

All classes were adjusted by social environment index, total population.

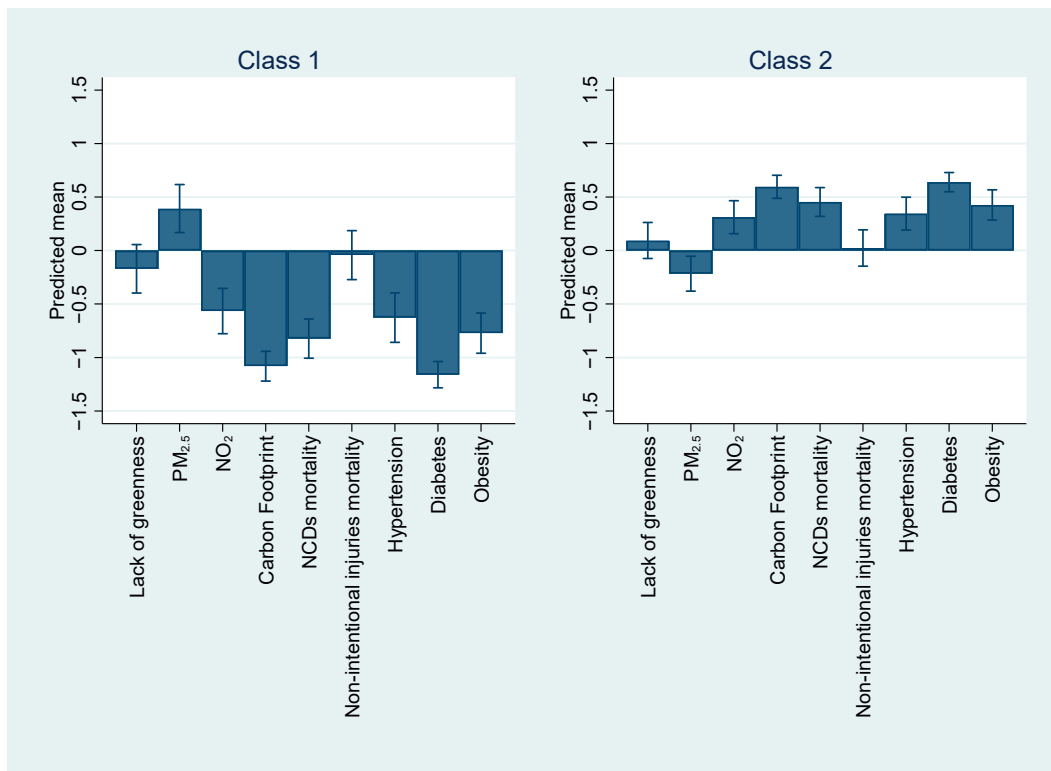

**Figure S1.** Description of the latent class analysis for 2 classes. All classes were adjusted by social environment index, total population.

**Table S6.** Description of the latent class analysis for 3 classes.

|                                    | Class 1 | Class 2 | Class 3 |
|------------------------------------|---------|---------|---------|
| Probability of Class               | 0.27    | 0.29    | 0.44    |
| Environmental outcomes             |         |         |         |
| Lack of green space                | -0.05   | -0.08   | 0.09    |
| PM <sub>2.5</sub>                  | 0.65    | -0.25   | -0.24   |
| NO <sub>2</sub>                    | -0.54   | 0.07    | 0.29    |
| Carbon footprint per capita        | -1.11   | 0.43    | 0.41    |
| Health outcomes                    |         |         |         |
| NCDs mortality                     | -1.04   | -0.22   | 0.80    |
| Non-intentional injuries mortality | -0.14   | -0.13   | 0.17    |
| Hypertension                       | -1.17   | 1.15    | -0.04   |
| Diabetes                           | -1.36   | 0.02    | 0.83    |
| Obesity                            | -0.83   | -0.61   | 0.92    |

All classes were adjusted by social environment index, total population.

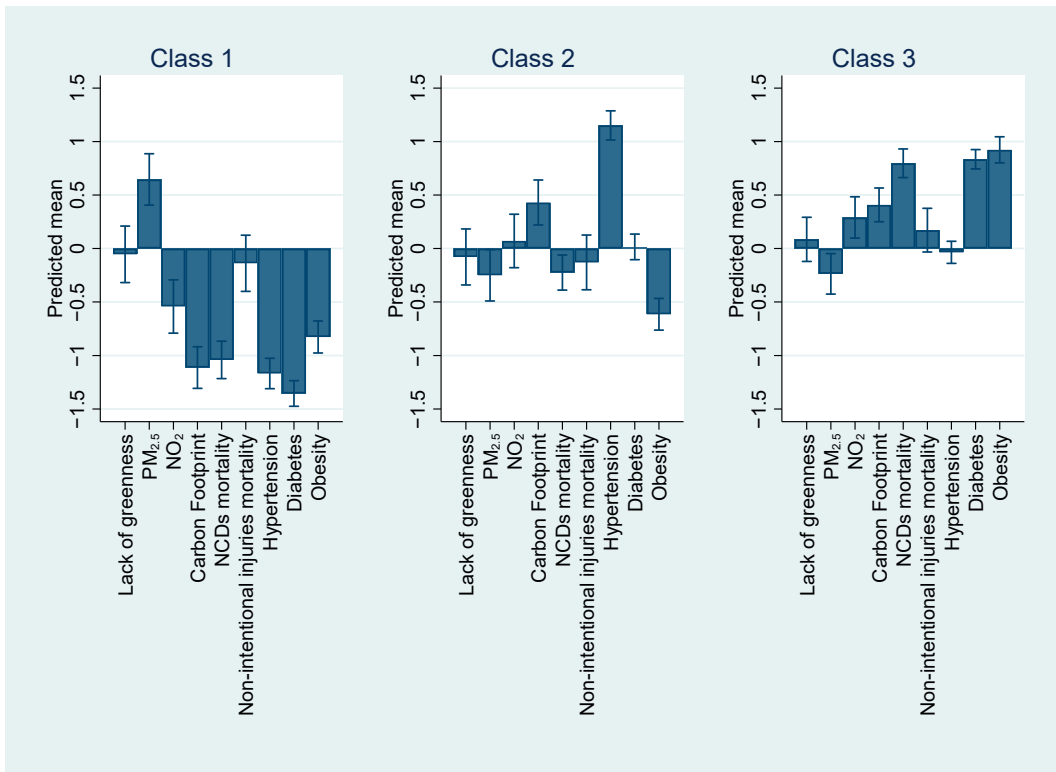

**Figure S2.** Description of the latent class analysis for 3 classes. All classes were adjusted by social environment index, total population.

**Table S7.** Description of the latent class analysis for 4 classes.

|                                    | <b>Class 1</b> | <b>Class 2</b> | <b>Class 3</b> | <b>Class 4</b> |
|------------------------------------|----------------|----------------|----------------|----------------|
| Probability of Class               | 0.26           | 0.15           | 0.16           | 0.43           |
| Environmental outcomes             |                |                |                |                |
| Lack of green space                | -0.01          | -0.55          | 0.30           | 0.09           |
| PM <sub>2.5</sub>                  | 0.62           | -0.23          | -0.14          | -0.24          |
| NO <sub>2</sub>                    | -0.54          | -0.36          | 0.42           | 0.29           |
| Carbon footprint per capita        | -1.10          | -0.79          | 1.44           | 0.41           |
| Health outcomes                    |                |                |                |                |
| NCDs mortality                     | -1.11          | -0.11          | -0.30          | 0.81           |
| Non-intentional injuries mortality | -0.20          | 0.29           | -0.45          | 0.18           |
| Hypertension                       | -1.22          | 1.22           | 0.99           | -0.05          |
| Diabetes                           | -1.39          | -0.30          | 0.30           | 0.83           |
| Obesity                            | -0.83          | -0.54          | -0.67          | 0.94           |

All classes were adjusted by social environment index, total population.

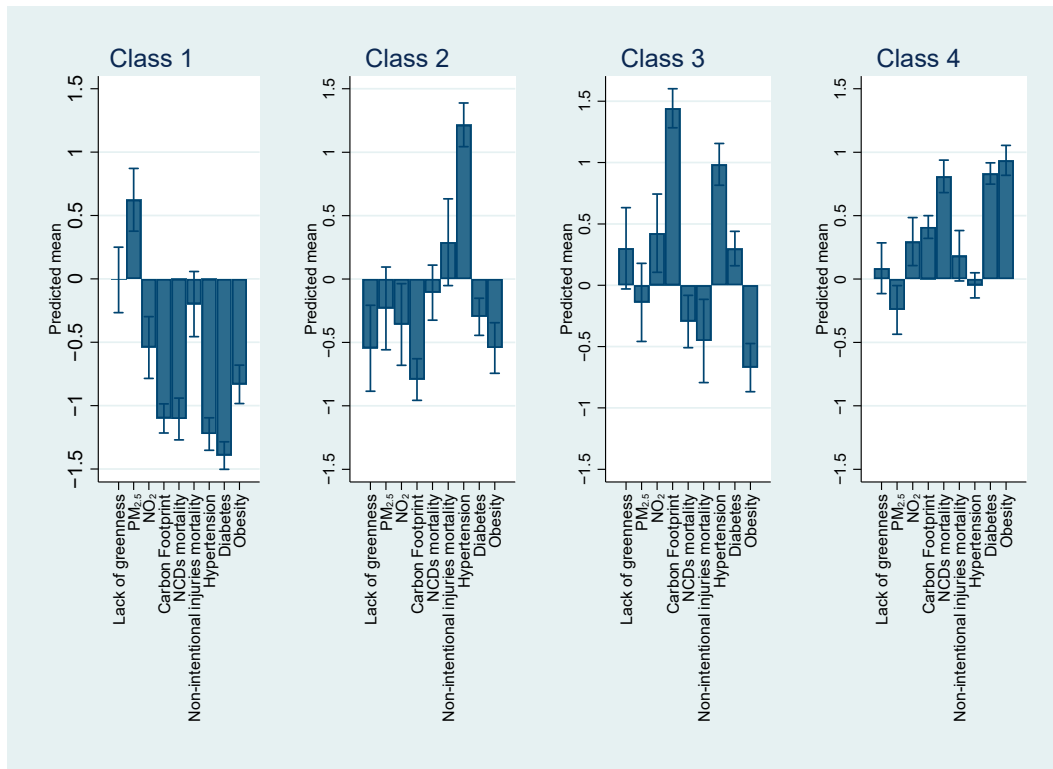

**Figure S3.** Description of the latent class analysis for 4 classes. All classes were adjusted by social environment index, total population.

**Table S8.** Description of the latent class analysis for 5 classes.

|                                    | <b>Class 1</b> | <b>Class 2</b> | <b>Class 3</b> | <b>Class 4</b> | <b>Class 5</b> |
|------------------------------------|----------------|----------------|----------------|----------------|----------------|
| Probability of Class               | 0.26           | 0.15           | 0.31           | 0.16           | 0.12           |
| Environmental outcomes             |                |                |                |                |                |
| Lack of green space                | -0.01          | -0.54          | -0.36          | 0.30           | 1.18           |
| PM <sub>2.5</sub>                  | 0.62           | -0.24          | 0.24           | -0.13          | -1.46          |
| NO <sub>2</sub>                    | -0.54          | -0.36          | 0.29           | 0.43           | 0.29           |
| Carbon footprint per capita        | -1.10          | -0.79          | 0.29           | 1.44           | 0.69           |
| Health outcomes                    |                |                |                |                |                |
| NCDs mortality                     | -1.10          | -0.10          | 0.72           | -0.29          | 1.03           |
| Non-intentional injuries mortality | -0.20          | 0.30           | 0.01           | -0.45          | 0.60           |
| Hypertension                       | -1.22          | 1.22           | -0.12          | 0.98           | 0.13           |
| Diabetes                           | -1.39          | -0.31          | 0.85           | 0.30           | 0.81           |
| Obesity                            | -0.83          | -0.55          | 0.86           | -0.66          | 1.14           |

All classes were adjusted by social environment index, total population.

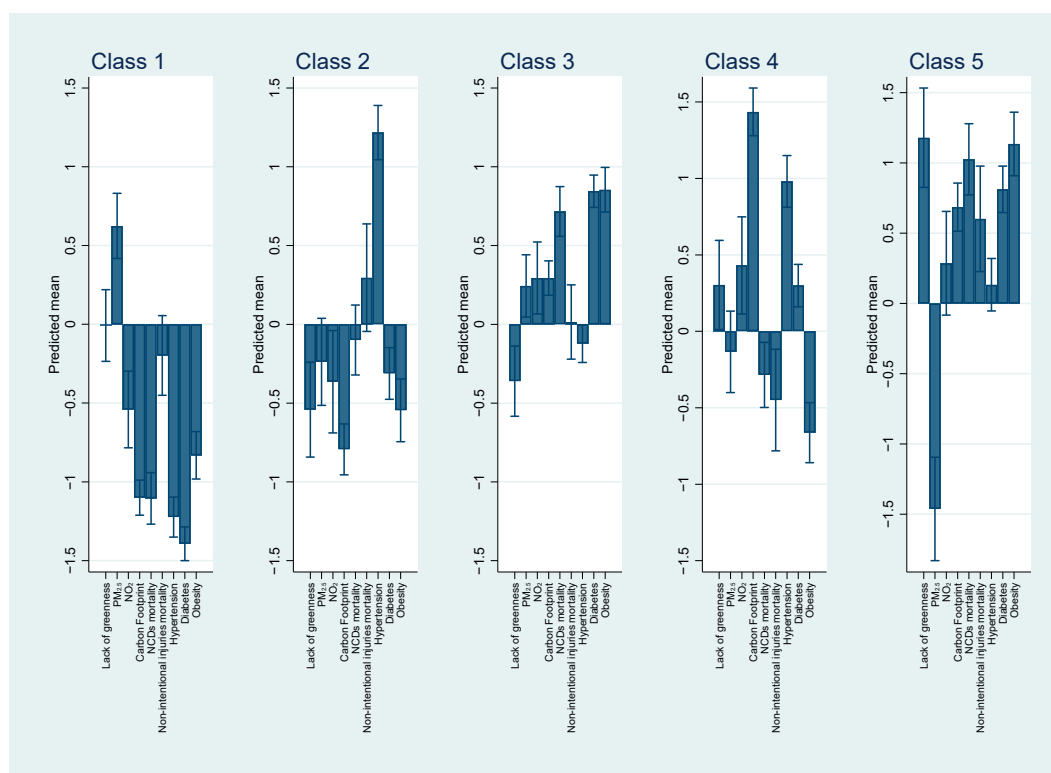

**Figure S4.** Description of the latent class analysis for 5 classes. All classes were adjusted by social environment index, total population.



**Table S9.** Latent Class Analysis Model fit criteria.

| <b>Models</b> | <b>N</b> | <b>LL (null)</b> | <b>LL (model)</b> | <b>df</b> | <b>AIC</b> | <b>BIC</b> |
|---------------|----------|------------------|-------------------|-----------|------------|------------|
| 2 Class       | 208      | .                | -2383.013         | 30        | 4826.027   | 4926.153   |
| 3 Class       | 208      | .                | -2231.721         | 42        | 4547.442   | 4687.618   |
| 4 Class       | 208      | .                | -2098.637         | 54        | 4305.273   | 4485.5     |
| 5 Class       | 208      | .                | -2048.533         | 66        | 4229.066   | 4449.343   |

**Table S10.** Latent Class Analysis Model Diagnostic criteria.

| <b>Models</b> | <b>Smallest class count (n)</b> | <b>Smallest class size (%)</b> | <b>Entropy</b> |
|---------------|---------------------------------|--------------------------------|----------------|
| 2 Class       | 74                              | 35.58                          | 0.963          |
| 3 Class       | 56                              | 26.92                          | 0.965          |
| 4 Class       | 32                              | 15.38                          | 0.994          |
| 5 Class       | 25                              | 12.02                          | 0.992          |
